# Supplementary material
Source: publisher figshare collection journal article supplement (https://wiley.figshare.com/articles/dataset/_/3524351)
Supplement: Supplementary file 1 [file 1 › appendix-D.htm]

Ecological Archives E086-041-A4


### *Ecological Archives* E086-041-A4

### **Brian S. Cade, Barry R. Noon, and Curtis H. Flather. 2005. Quantile regression reveals hidden bias and uncertainty in habitat models. *Ecology* 86:786-800.**

Appendix D. Estimating
local quantile weights. A
pdf version is also available.

We used the Hall
and Sheather (1988) bandwidth selection rule recommended by Koenker
and Machado (1999) but did not use their approach of taking differences
between estimates for the highest and lowest quantile within the bandwidth.
Instead, weights were computed by taking the average pairwise difference between
all unweighted quantile estimates for *b*0(),
*b*1(), and *b*2()
within the interval  plus or minus *h*(),
where *h*() was the bandwidth for a specified quantile.
This reduced the number of negative weights due to crossing of regression quantile
estimates at extreme regions of the design matrix that occurred with the method
used by Koenker and Machado (1999). Still, small constants
had to be added to the average pairwise differences for *b*0()
to assure positive weights for a couple of quantiles.

An example of computations for the
quantile interval weights based on a modification of the method proposed by
Koenker and Machado (1999) is provided for the 0.90 quantile
for the model including bed elevation and bed elevation2. The Hall
and Sheather (1988) bandwidth rule assuming a normal distribution (for convenience)
is *h*() = *n*-1/3*z*2/3[1.52(-1())/2(-1())2 + 1)]1/3,
where *z* satisfies (*z*) = 1 - /2,
 is the cdf and  is the pdf of
the standard normal distribution; and for the 0.90 quantile,  = 0.10,
and *n* = 200 yielded a recommended bandwidth of *h*(0.90) = 0.05264.
The estimates *b*0(), *b*1(),and
*b*2() were obtained for all quantiles in
the interval 0.90 plus or minus *h*(0.90) 
[0.84736, 0.95264]. This interval contained 22 regression quantile estimates,
and the average pairwise difference between them was 81.0003 for *b*0(),
56.5343 for *b*1(), and 9.98316 for *b*2().
Plots of *b*1() and *b*2()
by  were examined to determine the sign of the rates of change
to assign to the estimated difference coefficients. For this quantile the weights
were *w*(0.90) = (2 × 0.05264)/(81.0031 – 56.5343 × bed
elevation + 9.9832 × bed elevation2). Plots of the
weights as a function of bed elevation were examined to check for any negative
weights; none occurred for *w*(0.90). When negative weights were encountered
a small constant was added to the denominator of the function to shift them
all to positive values while preserving their relative value. The weights were
then multiplied by *Macomona* >15 mm counts (*y*), bed elevation
(*X*1) and bed elevation2 (*X*2)
to estimate the 0.90 quantile regression for the model *w*(0.90)*y* = *w*(0.90)*β*0(0.90) + *w*(0.90)*β*1(0.90)*X*1 + *w*(0.90)*β*2(0.90)*X*2and to compute confidence intervals based on inverting the quantile rank
score tests.

LITERATURE
CITED

Hall, P., and S. Sheather. 1988.
On the distribution of a studentized quantile. Journal of the Royal Statistical
Society, Ser. B **50**:381–391.

Koenker, R., and J. A. F. Machado.
1999. Goodness of fit and related inference processes for quantile regression.
Journal of the American Statistical Association **94**:1296–1310.

---

  
[Back to E086-041]
